# Supplementary material for: Taking a Breath of the Wild : are geoscientists more effective than non-geoscientists in determining whether video game world landscapes are realistic?
Source: Copernicus journal article supplement (doi:10.5194/gc-2-117-2019), 2019-08-13
Supplement: Supplementary file 1 [file gc-2-117-2019-supplement.zip]

# Into the wild: how realistic are artistic renderings?

In this short survey we want to study whether people consider artistic computer renderings of landscapes to be realistic. To test this we have collected a sample of both computer rendered landscapes as well as photos from the real world. Since we want to test if the features in artistic landscapes are considered realistic, not if people can see if a landscape is rendered, we have applied a "van Gogh"-filter to all pictures.

The question we want you to answer on each of the drawings below is: "Knowing that this picture has gone through a "van Gogh"-filter, how likely do you think it is that the features depicted in the artistic renderings could exist in the real world? We use a 10 point scale where 1 = completely unlikely to 10 = completely likely"

Taking this survey should take about 5 minutes.

Thank you very much for participating!

Official survey text:

By continuing you confirm that you understand that your participation is entirely voluntary. You understand that your responses will be kept strictly confidential and anonymous. You have the option to withdraw from this study at any time, without penalty, and you also have the right to request that your responses not be used.

## General questions

Before we start with the pictures we have some quick questions about you.

### 1. Do you consider yourself a geoscientist?

*Mark only one oval.*

☐

Yes

☐

No (skip the next question)

### 2. What is your main field of study within geoscience?

---

### 3. Do you consider yourself a "gamer"

*Mark only one oval.*

☐

Yes

☐

No

**4. Which of the following games have you played at least once in the last year?**

*Check all that apply.*

- ☐ Settlers of Catan
- ☐ Magic the Gathering
- ☐ Hearthstone
- ☐ Call of Duty
- ☐ Jumanji
- ☐ This war of mine (boardgame)
- ☐ This war of mine (videogame)
- ☐ Zelda Breath of the Wild
- ☐ Pokemon Go
- ☐ Chess
- ☐ Warhammer or Warhammer 40k
- ☐ Dungeons and Dragons or any other (tabletop) Role Playing Game (not computer RPGs)
- ☐ World of Warcraft or any other Massive Multiplayer Online Role Playing Game.
- ☐ Any other card Game not mentioned above
- ☐ Any other video Game not mentioned above
- ☐ Any other board Game not mentioned above

**5. What is your highest completed education level?**

---

**6. Whats is your age?**

---

**7. What is your gender?**

---

**8. Do you want to be kept informed about the results of this study, please leave your email address below. We will not use your email address for any other purpose.**

---

## **Picture section**

For each picture below, please answer the following question:

Knowing that this picture has gone through a "van Gogh"-filter, how likely do you think it is that the features depicted in the artistic renderings could exist in the real world?

We use a 10 point scale where 1 = completely unlikely to 10 = completely likely.

## 9. Picture 1

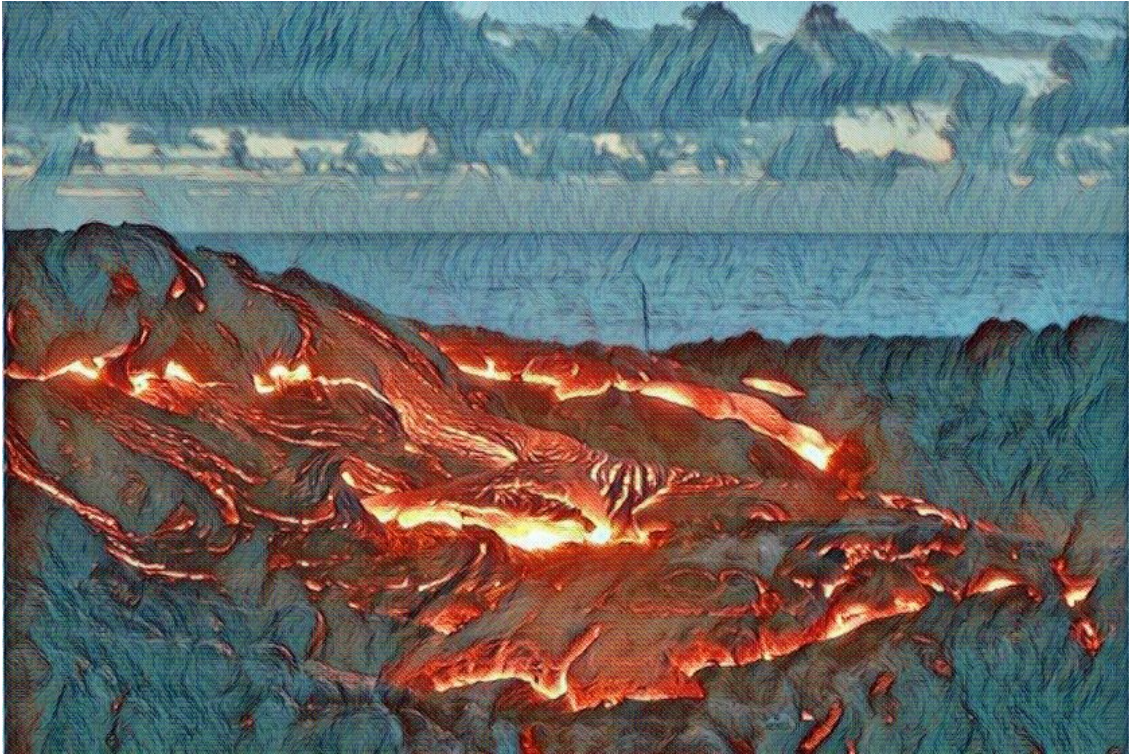

Mark only one oval.

|                              | 1                     | 2                     | 3                     | 4                     | 5                     | 6                     | 7                     | 8                     | 9                     | 10                    |                            |
|------------------------------|-----------------------|-----------------------|-----------------------|-----------------------|-----------------------|-----------------------|-----------------------|-----------------------|-----------------------|-----------------------|----------------------------|
| completely unlikely to exist | <input type="radio"/> | completely likely to exist |

10. **Picture 2**

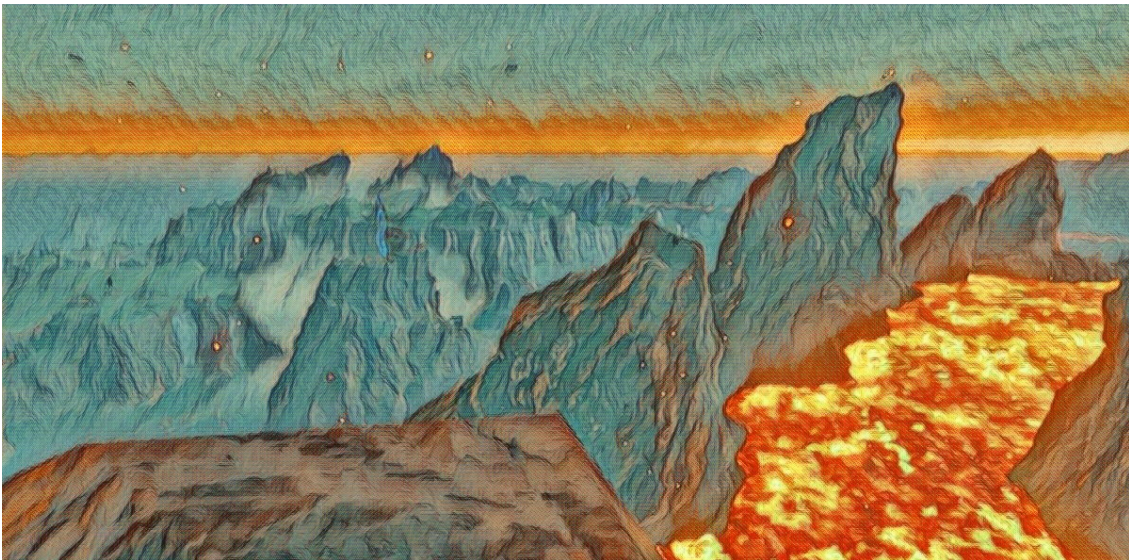

Mark only one oval.

|                              | 1                     | 2                     | 3                     | 4                     | 5                     | 6                     | 7                     | 8                     | 9                     | 10                    |                            |
|------------------------------|-----------------------|-----------------------|-----------------------|-----------------------|-----------------------|-----------------------|-----------------------|-----------------------|-----------------------|-----------------------|----------------------------|
| completely unlikely to exist | <input type="radio"/> | completely likely to exist |



### 11. Picture 3

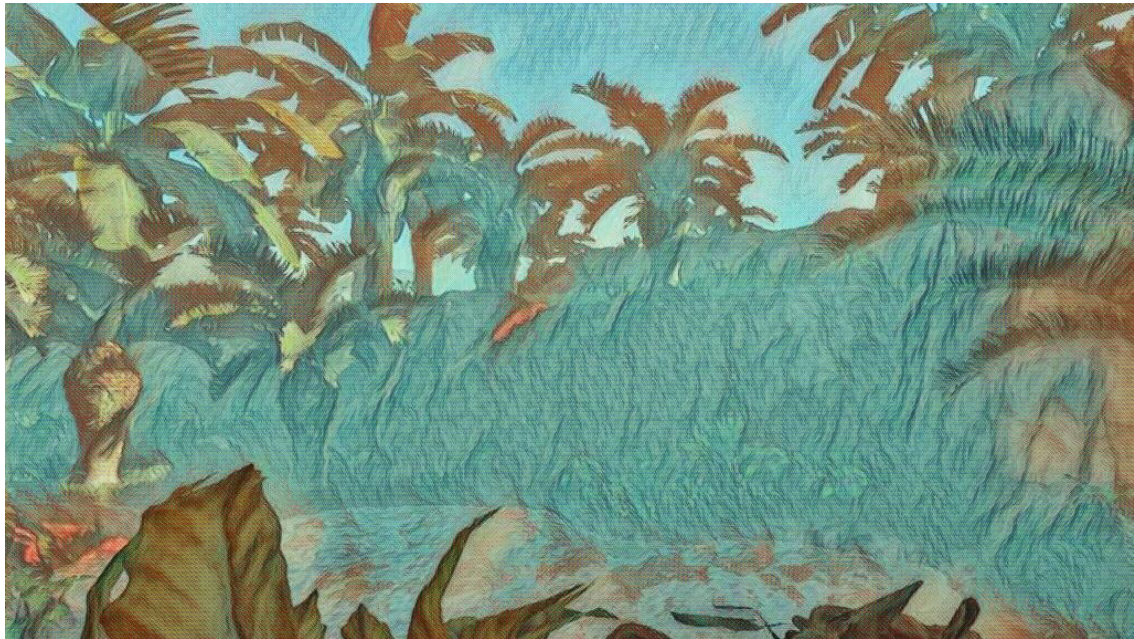

Mark only one oval.

completely unlikely to exist

|  | 1                     | 2                     | 3                     | 4                     | 5                     | 6                     | 7                     | 8                     | 9                     | 10                    |                            |
|--|-----------------------|-----------------------|-----------------------|-----------------------|-----------------------|-----------------------|-----------------------|-----------------------|-----------------------|-----------------------|----------------------------|
|  | <input type="radio"/> | completely likely to exist |

**12. Picture 4**

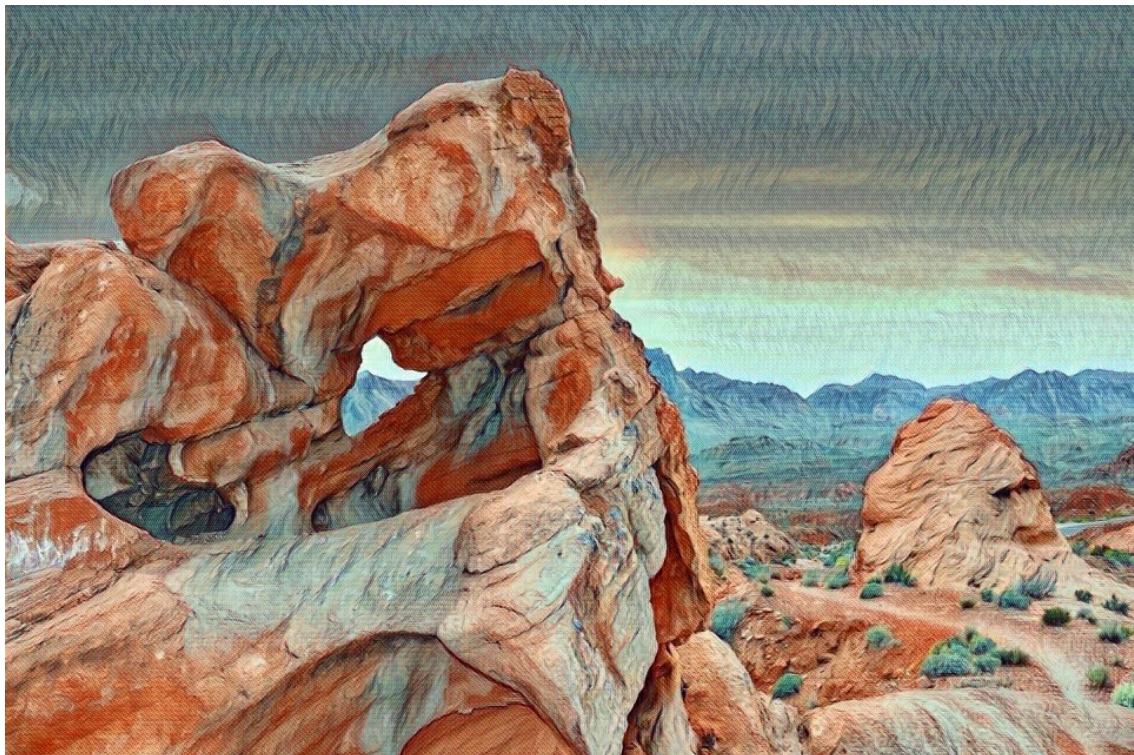

Mark only one oval.

completely unlikely to exist      1      2      3      4      5      6      7      8      9      10      completely likely to exist



1      2      3      4      5      6      7      8      9      10



completely  
likely to  
exist

## A stylized illustration of a snowy mountain landscape. The scene features a winding path or road that curves through a valley covered in snow. In the foreground, a large, snow-covered rock formation is visible on the left. The background shows steep, snow-covered mountainsides dotted with evergreen trees. The sky is a pale, hazy blue. The overall style is painterly and serene, with a cool color palette dominated by blues, whites, and greens.

1      2      3      4      5      6      7      8      9      10



completely  
likely to  
exist



**15. Picture 7**

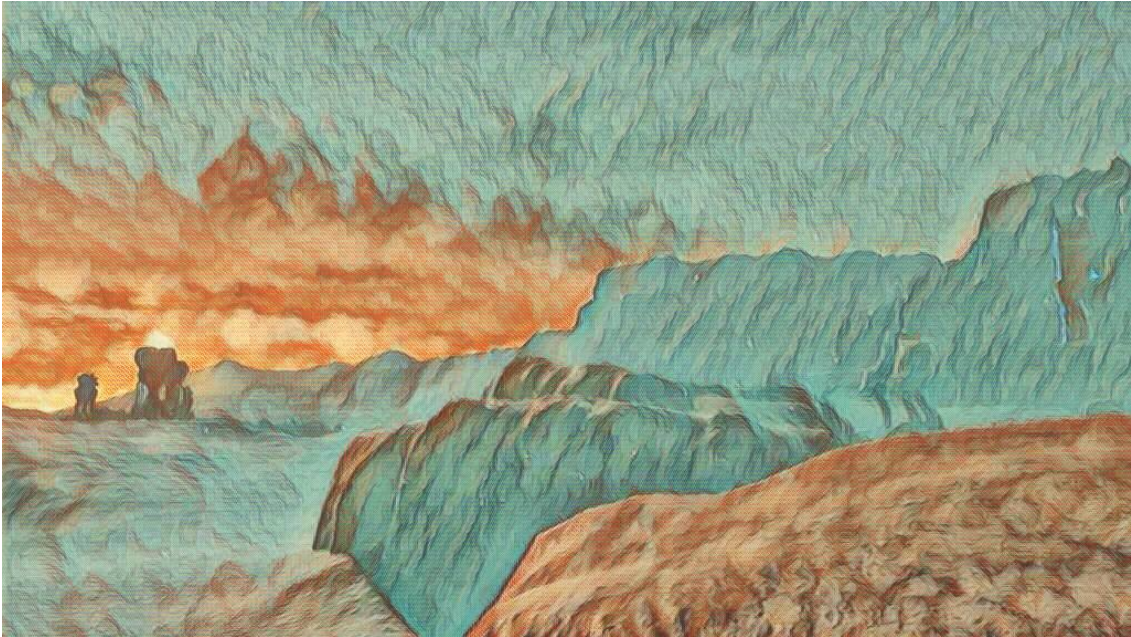

Mark only one oval.

1 2 3 4 5 6 7 8 9 10

completely unlikely to exist completely likely to exist

16. **Picture 8**

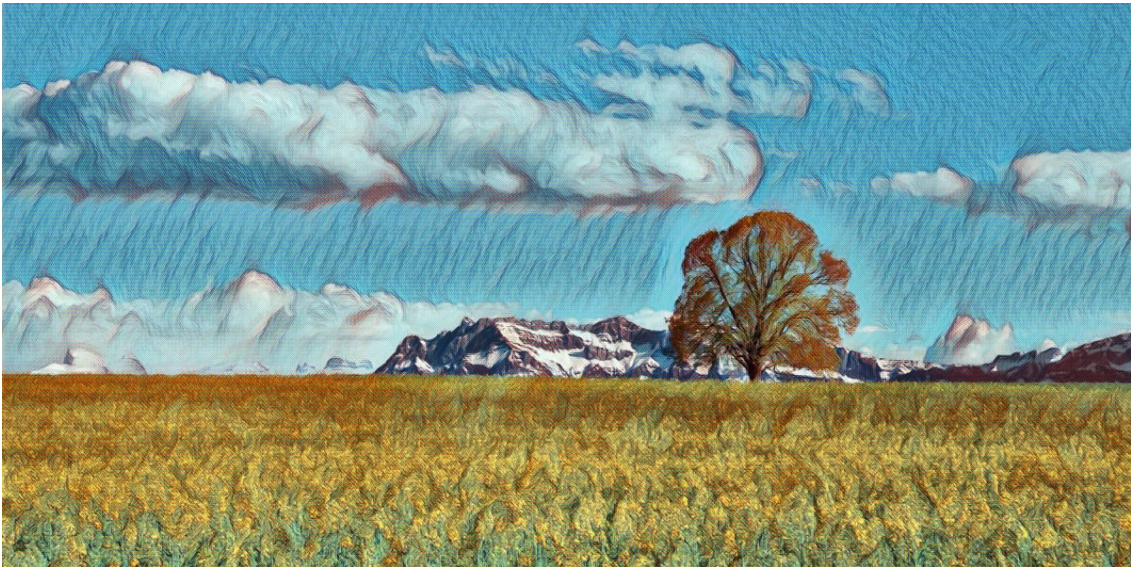

Mark only one oval.

1 2 3 4 5 6 7 8 9 10

completely unlikely to exist completely likely to exist



**17. Picture 9**

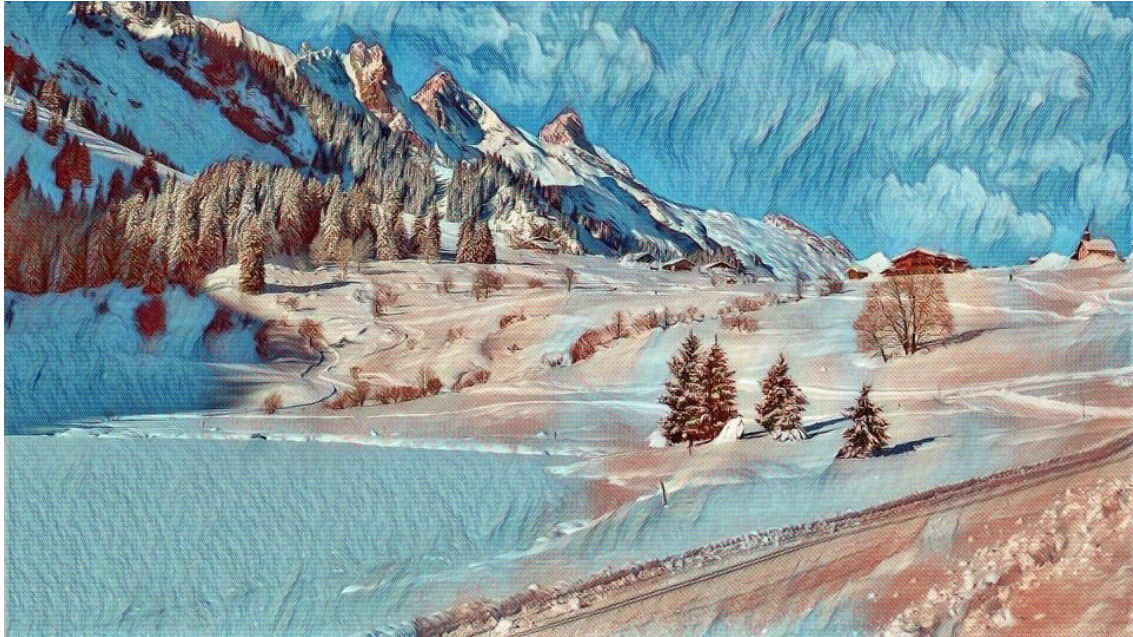

Mark only one oval.

|                              | 1                     | 2                     | 3                     | 4                     | 5                     | 6                     | 7                     | 8                     | 9                     | 10                    |                            |
|------------------------------|-----------------------|-----------------------|-----------------------|-----------------------|-----------------------|-----------------------|-----------------------|-----------------------|-----------------------|-----------------------|----------------------------|
| completely unlikely to exist | <input type="radio"/> | completely likely to exist |

**18. Picture 10**

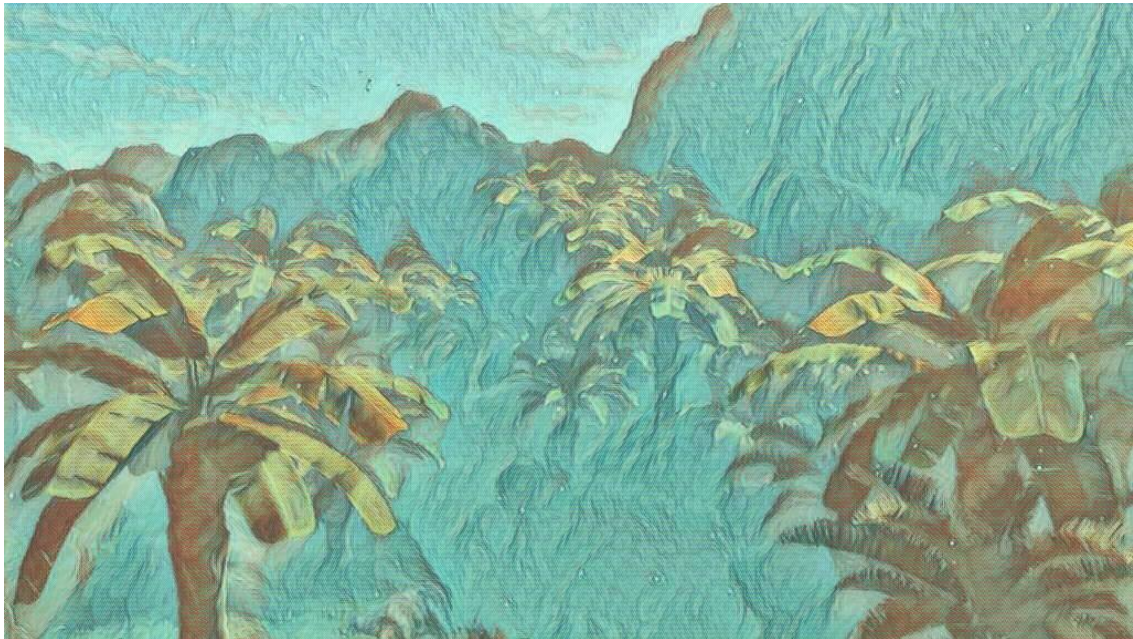

Mark only one oval.

1 2 3 4 5 6 7 8 9 10

completely unlikely to exist completely likely to exist



19. **Picture 11**

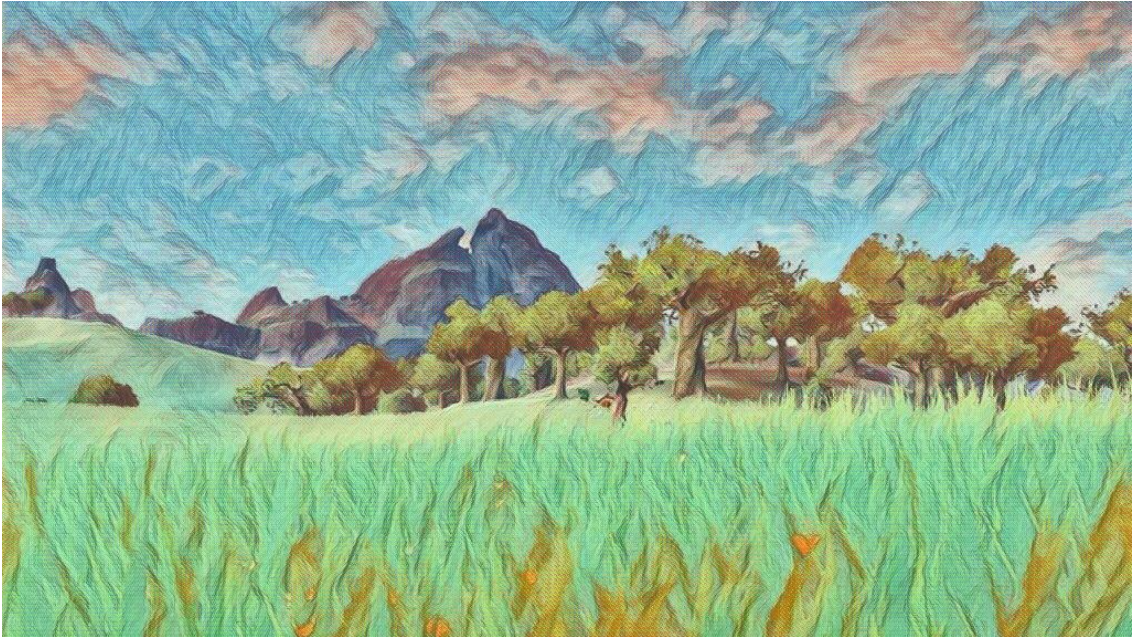

Mark only one oval.

|                                    |                       |                       |                       |                       |                       |                       |                       |                       |                       |                       |                                  |
|------------------------------------|-----------------------|-----------------------|-----------------------|-----------------------|-----------------------|-----------------------|-----------------------|-----------------------|-----------------------|-----------------------|----------------------------------|
|                                    | 1                     | 2                     | 3                     | 4                     | 5                     | 6                     | 7                     | 8                     | 9                     | 10                    |                                  |
| completely<br>unlikely to<br>exist | <input type="radio"/> | completely<br>likely to<br>exist |



20. **Picture 12**

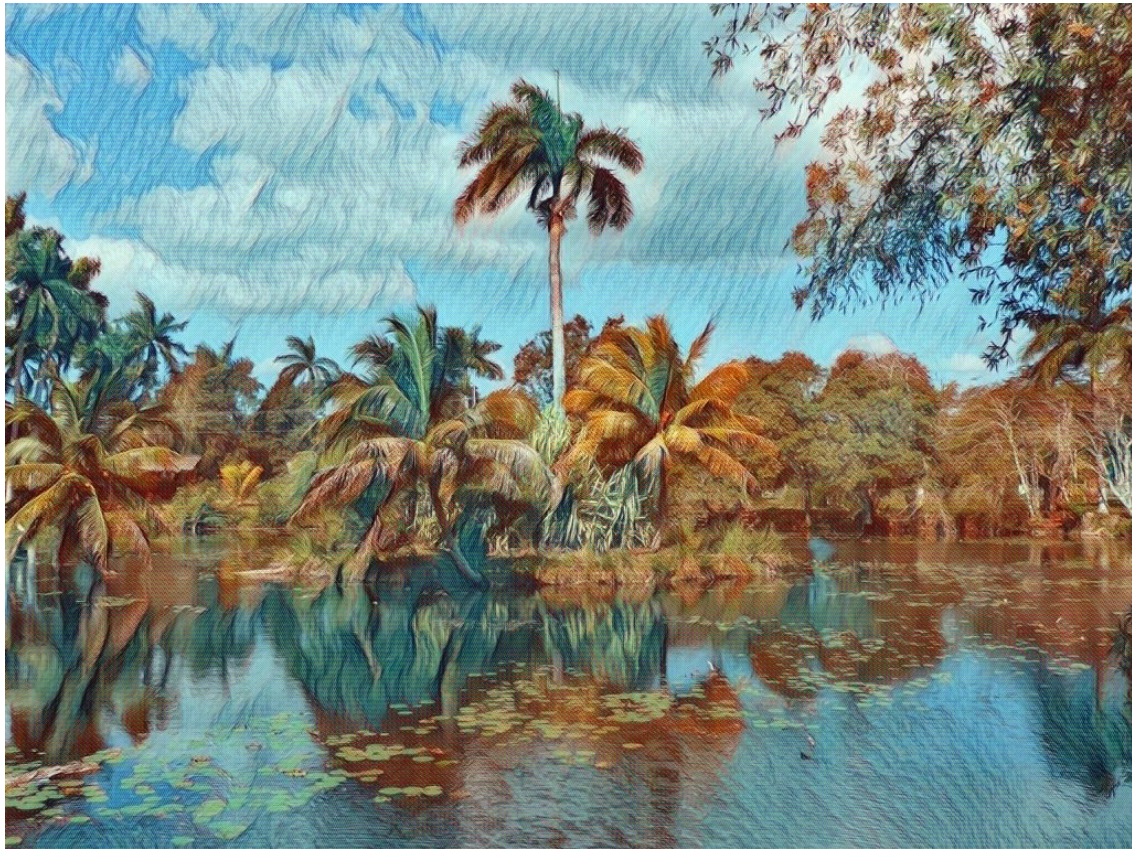

Mark only one oval.

|                                    |                       |                       |                       |                       |                       |                       |                       |                       |                       |                       |                                  |
|------------------------------------|-----------------------|-----------------------|-----------------------|-----------------------|-----------------------|-----------------------|-----------------------|-----------------------|-----------------------|-----------------------|----------------------------------|
|                                    | 1                     | 2                     | 3                     | 4                     | 5                     | 6                     | 7                     | 8                     | 9                     | 10                    |                                  |
| completely<br>unlikely to<br>exist | <input type="radio"/> | completely<br>likely to<br>exist |

21. **Any final comments?**

---

---

---

---

---

**Thank you!**

Thank you very much for participating in our survey.
