# Supplementary material for: Taking a Breath of the Wild : are geoscientists more effective than non-geoscientists in determining whether video game world landscapes are realistic?
Source: Copernicus journal article supplement (doi:10.5194/gc-2-117-2019), 2019-08-13
Supplement: Supplementary file 2 [file gc-2-117-2019-supplement.zip]

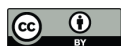

## *Supplement of*

# **Taking a *Breath of the Wild*: are geoscientists more effective than non-geoscientists in determining whether video game world landscapes are realistic?**

**Rolf Hut et al.**

*Correspondence to:* Rolf Hut ([r.w.hut@tudelft.nl](mailto:r.w.hut@tudelft.nl))

- [gc-2-117-2019-supplement-title-page.pdf](#)
- supplementary
  - .DS\_Store
  - BotWSurvey.pdf
  - images
    - \* .DS\_Store
    - \* ArtisticVanGogh
    - \* Zelda
    - \* real

The copyright of individual parts of the supplement might differ from the CC BY 4.0 License.
